# Supplementary material for: Targeting chromosomally unstable tumors with a selective KIF18A inhibitor
Source: PubMed Central journal article supplement — Nat Commun. 2025 Jan 2;16:307. doi: 10.1038/s41467-024-55300-z (PMC11697083; doi:10.1038/s41467-024-55300-z), 2025-01-02
Supplement: 41467_2024_55300_MOESM2_ESM.pdf [file 41467_2024_55300_MOESM2_ESM.pdf]

## Reporting Summary

Nature Portfolio wishes to improve the reproducibility of the work that we publish. This form provides structure for consistency and transparency in reporting. For further information on Nature Portfolio policies, see our [Editorial Policies](#) and the [Editorial Policy Checklist](#).

### Statistics

For all statistical analyses, confirm that the following items are present in the figure legend, table legend, main text, or Methods section.

- |     |           |
|-----|-----------|
| n/a | Confirmed |
|-----|-----------|
- The exact sample size ( $n$ ) for each experimental group/condition, given as a discrete number and unit of measurement
  - A statement on whether measurements were taken from distinct samples or whether the same sample was measured repeatedly
  - The statistical test(s) used AND whether they are one- or two-sided  
*Only common tests should be described solely by name; describe more complex techniques in the Methods section.*
  - A description of all covariates tested
  - A description of any assumptions or corrections, such as tests of normality and adjustment for multiple comparisons
  - A full description of the statistical parameters including central tendency (e.g. means) or other basic estimates (e.g. regression coefficient) AND variation (e.g. standard deviation) or associated estimates of uncertainty (e.g. confidence intervals)
  - For null hypothesis testing, the test statistic (e.g.  $F$ ,  $t$ ,  $r$ ) with confidence intervals, effect sizes, degrees of freedom and  $P$  value noted  
*Give  $P$  values as exact values whenever suitable.*
  - For Bayesian analysis, information on the choice of priors and Markov chain Monte Carlo settings
  - For hierarchical and complex designs, identification of the appropriate level for tests and full reporting of outcomes
  - Estimates of effect sizes (e.g. Cohen's  $d$ , Pearson's  $r$ ), indicating how they were calculated

*Our web collection on [statistics for biologists](#) contains articles on many of the points above.*

### Software and code

Policy information about [availability of computer code](#)

|                 |                                                                                                                                                                                                                                                                                                                                                                                                                                                                                                                                  |
|-----------------|----------------------------------------------------------------------------------------------------------------------------------------------------------------------------------------------------------------------------------------------------------------------------------------------------------------------------------------------------------------------------------------------------------------------------------------------------------------------------------------------------------------------------------|
| Data collection | PerkinElmer VICTOR Nivo Control Software (version 4.0.7), LI-COR Image Studio (version 1.0.20), PerkinElmer Harmony (version 4.9), SpectroFlo (version 2.2.0.4), Bitplane Imaris imaging software                                                                                                                                                                                                                                                                                                                                |
| Data analysis   | PerkinElmer Harmony (version 4.9), FCS Express (version 7), FIJI (version Madison), Microsoft Excel (version 16.66.1), GraphPad Prism (version 9.4.1), Molecular Operating Environment (MOE) software, Version 2022.02 (Chemical Computing Group ULC, 2022), R (version 4.1.2), R libraries - ggpubr (version 0.4), dplyr (version 1.0), Python (version 3.9.5) using pandas (version 1.3.4), numpy (version 1.20.3), seaborn (version 0.11.2), scipy (version 1.7.1), statsmodels (version 0.12.2), matplotlib (version 3.4.3). |

For manuscripts utilizing custom algorithms or software that are central to the research but not yet described in published literature, software must be made available to editors and reviewers. We strongly encourage code deposition in a community repository (e.g. GitHub). See the Nature Portfolio [guidelines for submitting code & software](#) for further information.

### Data

Policy information about [availability of data](#)

All manuscripts must include a [data availability statement](#). This statement should provide the following information, where applicable:

- Accession codes, unique identifiers, or web links for publicly available datasets
- A description of any restrictions on data availability
- For clinical datasets or third party data, please ensure that the statement adheres to our [policy](#)

The authors declare that the data supporting the findings of this study are available within the article and its supplementary information files. The locations of

publicly available datasets can be found in the article. The versions of DEPMAP used in this study are the 2020 Q2 and the 2022 Q2 releases (<https://depmap.org/portal/download/>), as indicated in the Methods section of the manuscript. The published human KIF18A crystal structure (3LRE [<http://doi.org/10.2210/pdb3lre/pdb>]) was used for molecular docking.

## Research involving human participants, their data, or biological material

Policy information about studies with [human participants or human data](#). See also policy information about [sex, gender \(identity/presentation\), and sexual orientation](#) and [race, ethnicity and racism](#).

|                                                                    |     |
|--------------------------------------------------------------------|-----|
| Reporting on sex and gender                                        | N/A |
| Reporting on race, ethnicity, or other socially relevant groupings | N/A |
| Population characteristics                                         | N/A |
| Recruitment                                                        | N/A |
| Ethics oversight                                                   | N/A |

Note that full information on the approval of the study protocol must also be provided in the manuscript.

## Field-specific reporting

Please select the one below that is the best fit for your research. If you are not sure, read the appropriate sections before making your selection.

Life sciences  Behavioural & social sciences  Ecological, evolutionary & environmental sciences

For a reference copy of the document with all sections, see [nature.com/documents/nr-reporting-summary-flat.pdf](https://www.nature.com/documents/nr-reporting-summary-flat.pdf)

## Life sciences study design

All studies must disclose on these points even when the disclosure is negative.

|                 |                                                                                                                                                                                                                                                                                                |
|-----------------|------------------------------------------------------------------------------------------------------------------------------------------------------------------------------------------------------------------------------------------------------------------------------------------------|
| Sample size     | In vitro immunofluorescence studies, greater than 100 cells were analyzed in each experiment to permit statistical comparisons. In vivo tumor efficacy studies, at least 4 mice were included in each group. For all other studies, no statistical method was used to predetermine sample size |
| Data exclusions | No data was excluded from the analyses in this study.                                                                                                                                                                                                                                          |
| Replication     | Experiments were conducted with technical and biological replicates as indicated in the Figure Legends. Reported findings were successfully replicated.                                                                                                                                        |
| Randomization   | Randomization was performed in grouping tumor-bearing mice into vehicle and treatment groups.                                                                                                                                                                                                  |
| Blinding        | Blinding was not performed as no human or patient information was analyzed in this study. Blinding was not necessary as all samples in the same experiment were collected and analyzed under the same conditions.                                                                              |

## Reporting for specific materials, systems and methods

We require information from authors about some types of materials, experimental systems and methods used in many studies. Here, indicate whether each material, system or method listed is relevant to your study. If you are not sure if a list item applies to your research, read the appropriate section before selecting a response.

### Materials & experimental systems

| n/a                                 | Involvement in the study                                        |
|-------------------------------------|-----------------------------------------------------------------|
| <input type="checkbox"/>            | <input checked="" type="checkbox"/> Antibodies                  |
| <input type="checkbox"/>            | <input checked="" type="checkbox"/> Eukaryotic cell lines       |
| <input checked="" type="checkbox"/> | <input type="checkbox"/> Palaeontology and archaeology          |
| <input type="checkbox"/>            | <input checked="" type="checkbox"/> Animals and other organisms |
| <input checked="" type="checkbox"/> | <input type="checkbox"/> Clinical data                          |
| <input checked="" type="checkbox"/> | <input type="checkbox"/> Dual use research of concern           |
| <input checked="" type="checkbox"/> | <input type="checkbox"/> Plants                                 |

### Methods

| n/a                                 | Involvement in the study                           |
|-------------------------------------|----------------------------------------------------|
| <input checked="" type="checkbox"/> | <input type="checkbox"/> ChIP-seq                  |
| <input type="checkbox"/>            | <input checked="" type="checkbox"/> Flow cytometry |
| <input checked="" type="checkbox"/> | <input type="checkbox"/> MRI-based neuroimaging    |

## Antibodies

|                 |                                                                                                                                                                                                                                                                                                                                                                                                                                                                                                                                                                                                                                                                                                                                                                                                                                                                                                                                                                                                                                                                                                                                                                                                                                                                                                                                                                                                                       |
|-----------------|-----------------------------------------------------------------------------------------------------------------------------------------------------------------------------------------------------------------------------------------------------------------------------------------------------------------------------------------------------------------------------------------------------------------------------------------------------------------------------------------------------------------------------------------------------------------------------------------------------------------------------------------------------------------------------------------------------------------------------------------------------------------------------------------------------------------------------------------------------------------------------------------------------------------------------------------------------------------------------------------------------------------------------------------------------------------------------------------------------------------------------------------------------------------------------------------------------------------------------------------------------------------------------------------------------------------------------------------------------------------------------------------------------------------------|
| Antibodies used | <p>Antibodies for western blotting: rabbit anti-KIF18A (1:500, Fortis Lifesciences (A301-080A)), rabbit anti-GAPDH (1:2500, Abcam (ab9485)), rabbit anti-caspase-3 (1:1000, Cell Signaling Technology (9662)), rabbit anti-vinculin (1:3000, Abcam ab129002) goat anti-rabbit IgG (H+L) antibody conjugated to IRDye 680RD (1:20000, LI-COR (926-68071))</p> <p>Antibodies used for immunofluorescence: anti-<math>\alpha</math>-tubulin clone DM1A (1:2000, Millipore Sigma(T6199)), rat anti-phospho Histone H3 (Ser10) clone 6G8B7 (1:2000, Millipore Sigma (05-636-I)), rabbit anti-KIF18A (1:500, Fortis Lifesciences (A301-080A)). goat anti-mouse IgG (H+L) Cross-Adsorbed Secondary Antibody, Alexa Fluor 488 (1:2000 (IF), Thermo Fisher Scientific (A11001)), Goat anti-Rat IgG (H+L) Cross-Adsorbed Secondary Antibody, Alexa Fluor 568 (1:2000 (IF), Thermo Fisher Scientific (A11077)), Goat anti-Rabbit IgG (H+L) Cross-Adsorbed Secondary Antibody, Alexa Fluor 647 (1:2000 (IF), Thermo Fisher Scientific (A21244)).</p> <p>Antibodies used for tissue staining: pHH3 primary antibody dilution of 1:3200 (Millipore (06-750), KIF18A (Sigma-Aldrich, HPA039484, 1:250) and <math>\alpha</math>-tubulin (Cell Signaling Technologies, 3873S, clone: [DM1A], 1:1000), Alexa Fluor-568 goat anti-rabbit IgG (Invitrogen, A11011) and Alexa Fluor-488 goat anti-mouse (Invitrogen, A11001) at 1:400.</p> |
| Validation      | <p>Rabbit anti-Kif18A was validated by the manufacturer using whole cell lysates (50 <math>\mu</math>g) from HeLa, HEK293T, Jurkat, and MCF-7 cells prepared using NETN lysis buffer. Rabbit anti-GAPDH was validated by the manufacturer using whole cell lysates (20 <math>\mu</math>g) from HeLa, A431, and A549 cells. Rabbit anti-Caspase-3 was validated by the manufacturer using whole cell lysates from HCT116 wild-type and Caspase-3 knockout cells. Goat anti-rabbit IgG (H+L) antibody conjugated to IRDye 680RD was validated by the manufacturer using a dot blot and/or solid-phase adsorbed for minimal cross-reactivity with human, mouse, rat, sheep, and chicken serum proteins. Rat anti-phospho Histone H3 (Ser10) clone 6G8B7 was validated by the manufacturers using 10 <math>\mu</math>g of nocodazole treated HeLa cell lysates. Secondary antibodies from Thermo Fisher Scientific were validated as described on their website (<a href="https://www.thermofisher.com/us/en/home/life-science/antibodies/invitrogen-antibody-validation.html">https://www.thermofisher.com/us/en/home/life-science/antibodies/invitrogen-antibody-validation.html</a>).</p>                                                                                                                                                                                                                              |

## Eukaryotic cell lines

Policy information about [cell lines and Sex and Gender in Research](#)

|                                                                   |                                                                                                                                                                                                                                                                                                                                                                                                                                                                                                                                 |
|-------------------------------------------------------------------|---------------------------------------------------------------------------------------------------------------------------------------------------------------------------------------------------------------------------------------------------------------------------------------------------------------------------------------------------------------------------------------------------------------------------------------------------------------------------------------------------------------------------------|
| Cell line source(s)                                               | <p>The following cell lines were purchased from American Type Culture Collection (ATCC): MDA-MB-231 (HTB-26), hTERT RPE-1 (CRL-4000), MCF10A (CRL-10317), HCC1806 (CRL-2335), and NIH:OVCAR-3 (HTB-161). The following cell lines were purchased from Deutsche Sammlung von Mikroorganismen und Zellkulturen (DSMZ): CAL51 (ACC-302) and HCC-15 (ACC-496). JIMT-1 cells (C0006005) were purchased from AddexBio. HT-55 cells (85061105) were purchased from the European Collection of Authenticated Cell Cultures (ECACC).</p> |
| Authentication                                                    | <p>Information on cell line authentication by STR was provided by the commercial sources for each cell line.</p>                                                                                                                                                                                                                                                                                                                                                                                                                |
| Mycoplasma contamination                                          | <p>Mycoplasma testing was assessed with the MycoAlert Mycoplasma Detection Kit from Lonza (catalog number LT07-318)</p>                                                                                                                                                                                                                                                                                                                                                                                                         |
| Commonly misidentified lines (See <a href="#">ICLAC</a> register) | <p>No commonly misidentified cell lines were used in the study</p>                                                                                                                                                                                                                                                                                                                                                                                                                                                              |

## Animals and other research organisms

Policy information about [studies involving animals](#); [ARRIVE guidelines](#) recommended for reporting animal research, and [Sex and Gender in Research](#)

|                         |                                                                                                                                                                                                                                                                                                         |
|-------------------------|---------------------------------------------------------------------------------------------------------------------------------------------------------------------------------------------------------------------------------------------------------------------------------------------------------|
| Laboratory animals      | <p>SCID Beige mice (Jihui Laboratory Animal Co. Ltd. and Beijing Vital River Laboratory Animal Technology Co., Ltd.), BALB/c nude mice (Beijing Vital River Laboratory Animal Technology Co., Ltd.), and CD-1 mice (Jihui Laboratory Animal Co. Ltd.) were used in this study, all at 6-8 week age.</p> |
| Wild animals            | <p>The study did not involved wild animals</p>                                                                                                                                                                                                                                                          |
| Reporting on sex        | <p>To avoid additional variables from mixed sex populations, all female mice (SCID Beige and Balb/c nude) or all male (CD-1 mice) were used in this study, as indicated in the Methods</p>                                                                                                              |
| Field-collected samples | <p>The study did not involve samples collected in the field</p>                                                                                                                                                                                                                                         |
| Ethics oversight        | <p>Tumor studies involving animals were approved by Volastra Therapeutics and the Institutional Animal Care and Use Committee (IACUC) of WuXi AppTec following the guidance of the Association for Assessment and Accreditation of Laboratory Animal Care (AAALAC).</p>                                 |

Note that full information on the approval of the study protocol must also be provided in the manuscript.

## Plants

|                       |     |
|-----------------------|-----|
| Seed stocks           | N/A |
| Novel plant genotypes | N/A |
| Authentication        | N/A |

## Flow Cytometry

### Plots

Confirm that:

- The axis labels state the marker and fluorochrome used (e.g. CD4-FITC).
- The axis scales are clearly visible. Include numbers along axes only for bottom left plot of group (a 'group' is an analysis of identical markers).
- All plots are contour plots with outliers or pseudocolor plots.
- A numerical value for number of cells or percentage (with statistics) is provided.

### Methodology

|                           |                                                                                                                                                                                                                                                                                                                                            |
|---------------------------|--------------------------------------------------------------------------------------------------------------------------------------------------------------------------------------------------------------------------------------------------------------------------------------------------------------------------------------------|
| Sample preparation        | JIMT-1 cells were harvested from cell culture plates and fixed in 4% paraformaldehyde solution for 15 minutes. Cell pellets were washed before treatment with the FxCycle PI/RNase Staining Solution (Thermo Fisher (F10797)) according to the manufacturer's directions.                                                                  |
| Instrument                | Data was collected using a Cytex NL-2000.                                                                                                                                                                                                                                                                                                  |
| Software                  | Data was collected using SpectroFlo (version 2.2.0.4) and analyzed with FCS Express (version 7).                                                                                                                                                                                                                                           |
| Cell population abundance | No cell sorting was conducted for these experiments. 20,000 events were collected and the singlet population was selected for analysis. The singlet population represented greater than 60% of the collected events in each sample.                                                                                                        |
| Gating strategy           | Forward and side scattering was used to identify the singlet population and omit debris and clumped cells for PI intensity measurements. The entire singlet population was analyzed in subsequent analyses with a gate that was created to capture the population of cells positively stained with the FxCycle PI/RNase Staining Solution. |

- Tick this box to confirm that a figure exemplifying the gating strategy is provided in the Supplementary Information.
