# Supplementary material for: Targeting chromosomally unstable tumors with a selective KIF18A inhibitor
Source: PubMed Central journal article supplement — Nat Commun. 2025 Jan 2;16:307. doi: 10.1038/s41467-024-55300-z (PMC11697083; doi:10.1038/s41467-024-55300-z), 2025-01-02
Supplement: 41467_2024_55300_MOESM7_ESM.pdf [file 41467_2024_55300_MOESM7_ESM.pdf]

Supplementary Movie 1.

Motility of taxol-stabilized rhodamine-labeled microtubules in the presence of immobilized His-cleaved GFP-tagged KIF18A (1-480).

Supplementary Movie 2.

Motility of taxol-stabilized rhodamine-labeled microtubules in the presence of immobilized His-cleaved GFP-tagged KIF18A (1-480) and 25 nM VLS1272.

Supplementary Data 1:

Area under the curve (AUC) calculated from VLS-1272 dose-response curves. Cell lines were treated with increasing doses of VLS-1272 and proliferation measured after 7 days by CellTiter-Glo. AUC values were computed from the resulting dose response curves.
